# Supplementary material for: PD-1 Blockade Reinvigorates Bone Marrow CD8+ T Cells from Patients with Multiple Myeloma in the Presence of TGFβ Inhibitors
Source: Oxford University Press journal article supplement (doi:10.1158/1078-0432.ccr-19-0267), 2020-01-15
Supplement: 10780432ccr190267-sup-215884_3_supp_5829960_pz7m59_ts2_r.xlsx [file 10780432ccr190267-sup-215884_3_supp_5829960_pz7m59_ts2_r.xlsx]

## Sheet: Sheet1
Supplementary Table S2. List of extranodal marginal zone B-cell lymphoma patients.
Patients	Sex	Age	Bone marrow involvement	Primary mass site	Treatment
EMZ-01	F	65	Ⅹ	Stomach, H.pylori (+)	HP irradication
EMZ-02	M	66	Ⅹ	Lt. mastoid space, Rt. Chest wall	Curative RTx
EMZ-03	M	60	Ⅹ	Stomach, H.pylori (+)	HP irradication
EMZ-04	F	75	Ⅹ	Lt. submandibular	Excision
EMZ-05	M	45	Ⅹ	Bilateral conjunctiva	Curative RTx
EMZ-06	M	59	Ⅹ	Lt. tonsil	Bilateral Tosilectomy
EMZ-07	F	72	Ⅹ	Lt. eyelid	Curative RTx
EMZ-08	M	83	Ⅹ	Lung	Curative RTx
EMZ-09	M	70	Ⅹ	Pharynx	Excision
EMZ-10	F	70	Ⅹ	Stomach, H.pylori (-)	Curative RTx
EMZ-11	M	70	Ⅹ	Stomach, H.pylori (+)	HP irradication
EMZ-12	M	60	Ⅹ	Bilat. conjunctiva	Curative RTx
EMZ-13	F	31	Ⅹ	Bilat. breast	Curative RTx
EMZ-14	F	73	Ⅹ	Rt. Parotid	Excision and RTx
EMZ-15	M	69	Ⅹ	Jejunum	Excision
EMZ-16	M	62	Ⅹ	Conjunctiva	Curative RTx
EMZ-17	M	54	Ⅹ	Stomach, H.pylori (-)	Curative RTx
EMZ-18	F	81	Ⅹ	Rt. eyelid	Curative RTx
HP indicates Helicobacter pyrlori; Lt., left; Rt., right; and RTx, Radiation therapy.
