# Supplementary material for: PD-1 Blockade Reinvigorates Bone Marrow CD8+ T Cells from Patients with Multiple Myeloma in the Presence of TGFβ Inhibitors
Source: Oxford University Press journal article supplement (doi:10.1158/1078-0432.ccr-19-0267), 2020-01-15
Supplement: 10780432ccr190267-sup-215884_3_supp_5829961_pz7z59_ts3_r.xlsx [file 10780432ccr190267-sup-215884_3_supp_5829961_pz7z59_ts3_r.xlsx]

## Sheet: Sheet1
Supplementary Table S3. List of MGUS/SMM patients.
Patients	Sex	Age	Ig isotype	Light chain
MGUS-01	M	67	G	λ
MGUS-02	M	55	G	κ
MGUS-03	F	74	G	κ
MGUS-04	M	79	G	κ
MGUS-05	F	87	M	κ
MGUS-06	M	62	G	κ
MGUS-07	M	69	G	λ
MGUS-08	M	74	G	κ
MGUS-09	M	71	A	λ
MGUS-10	M	71	G	λ
SMM-01	F	63	G	κ
SMM-02	F	78	G	λ
SMM-03	M	69	G	λ
SMM-04	F	52	A	λ
SMM-05	M	62	G	κ
SMM-06	F	69	G	λ
SMM-07	M	57	G	κ
